# Supplementary material for: Evidence of blue-shifting N–H⋯N hydrogen bonding despite elongation of the N–H bond
Source: Royal Society of Chemistry journal article supplement (doi:10.1039/c5ra17309d), 2015-01-01
Supplement: c5ra17309d1.pdf [file c5ra17309d1.pdf]

## Electronic Supplementary Information:

### Evidence of blue-shifting N–H···N hydrogen bonding despite elongation of the N–H bond

Prasenjit Pandey

Department of Chemistry, Asutosh College, 92, S.P. Mukherjee Road, Kolkata – 700026, India

E-mail: ppchem@gmail.com

1.

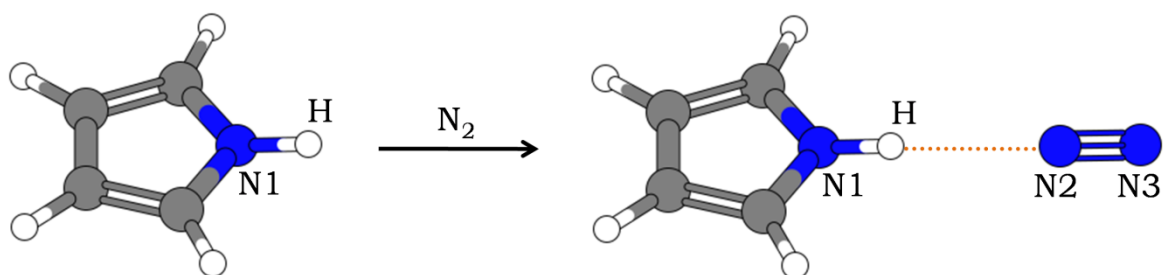

**Table S1.** Some geometrical parameters of pyrrole and pyrrole···N<sub>2</sub> cluster optimized at MP2/6-31+G(d) level of theory. Relevant atom labels are defined in the above picture.

| Geometrical Parameters | Pyrrole | Pyrrole···N <sub>2</sub> cluster |
|------------------------|---------|----------------------------------|
| N1–H (Å)               | 1.0123  | 1.0130                           |
| H···N2 (Å)             | ----    | 2.3673                           |
| N1–H–N2 (degree)       | ----    | 179.97                           |
| H–N2–N3 (degree)       | ----    | 179.99                           |

2.

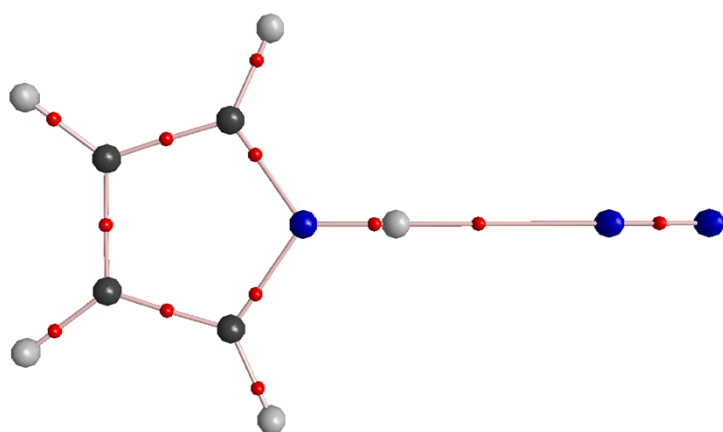

**Figure S1.** Bond critical points on the optimized geometry (at MP2/6-31+G(d) level of theory) of pyrrole···N<sub>2</sub> cluster, obtained by AIM calculation, are shown as red spheres. Blue, grey and white (shaded) spheres represent N, C and H respectively.

3.

**Table S2. Comparison of experimental  $\nu_{\text{N-H}}$  of pyrrole in gas phase with those computed (anharmonic) at various levels of theory**

| Experimental*<br>( $\text{cm}^{-1}$ ) | MP2/6-31G(d,p)<br>( $\text{cm}^{-1}$ ) | MP2/6-31+G(d)<br>( $\text{cm}^{-1}$ ) | MP2/6-31+G(d,p)<br>( $\text{cm}^{-1}$ ) | MP2/6-311++G(d,p)<br>( $\text{cm}^{-1}$ ) | MP2/aug-cc-pVDZ<br>( $\text{cm}^{-1}$ ) |
|---------------------------------------|----------------------------------------|---------------------------------------|-----------------------------------------|-------------------------------------------|-----------------------------------------|
| 3531                                  | 3615                                   | 3532                                  | 3597                                    | 3557                                      | 3538                                    |

\*Taken from Ref. 36 of the main manuscript.

4.

**Table S3. Theoretical predictions for changes of N-H bond length ( $\Delta r_{\text{N-H}}$ ) and shifts in N-H stretching frequency ( $\Delta \nu_{\text{N-H}}$ ) due to pyrrole $\cdots$ N<sub>2</sub> cluster formation.**

| Computational level | $\Delta r_{\text{N-H}}$ ( $\text{\AA}$ ) | $\Delta \nu_{\text{N-H}}$ (harmonic) | $\Delta \nu_{\text{N-H}}$ (anharmonic) |
|---------------------|------------------------------------------|--------------------------------------|----------------------------------------|
| MP2/6-31G(d,p)      | +0.0007                                  | -4 $\text{cm}^{-1}$                  | -2 $\text{cm}^{-1}$                    |
| MP2/6-31+G(d)       | +0.0007                                  | +3 $\text{cm}^{-1}$                  | +8 $\text{cm}^{-1}$                    |
| MP2/6-31+G(d,p)     | +0.0005                                  | -1 $\text{cm}^{-1}$                  | +0.3 $\text{cm}^{-1}$                  |
| MP2/6-311++G(d,p)   | +0.0005                                  | -4 $\text{cm}^{-1}$                  | -2 $\text{cm}^{-1}$                    |
| MP2/aug-cc-pVDZ     | +0.0005                                  | -1 $\text{cm}^{-1}$                  | -2 $\text{cm}^{-1}$                    |
